# Supplementary material for: Exceptionally active iridium evolved from a pseudo-cubic perovskite for oxygen evolution in acid
Source: PubMed Central journal article supplement (PMC6362036; doi:10.1038/s41467-019-08532-3), 2019-02-04
Supplement: 41467_2019_8532_MOESM1_ESM.pdf [file 41467_2019_8532_MOESM1_ESM.pdf]

**Supplementary information for**

**Exceptionally active iridium evolved from a pseudo-cubic  
perovskite for oxygen evolution in acid**

Chen et al.

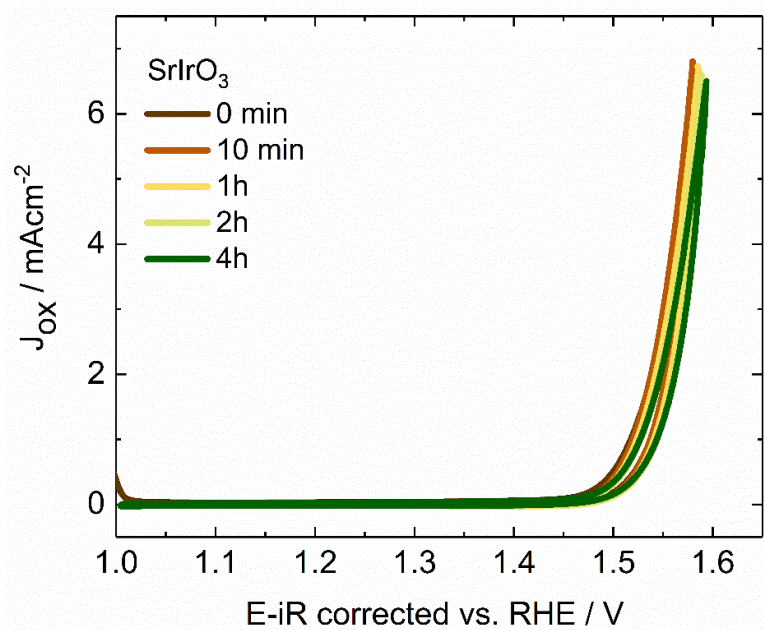

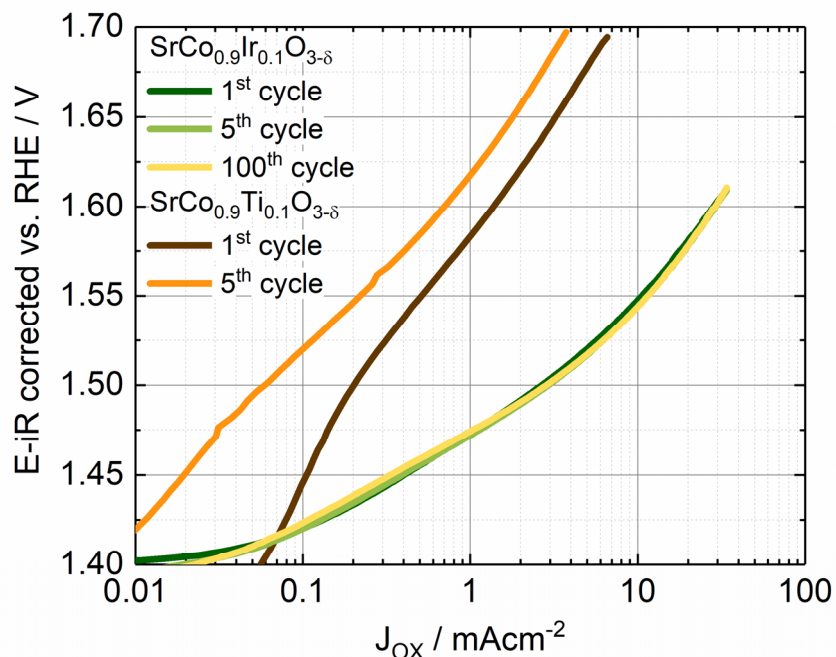

**Supplementary Figure 2. Specific activity comparison in 5 cycles.** Tafel plots of the specific activities of SrCo<sub>0.9</sub>Ir<sub>0.1</sub>O<sub>3-δ</sub> and SrCo<sub>0.9</sub>Ti<sub>0.1</sub>O<sub>3-δ</sub> in 0.1 M HClO<sub>4</sub>. The SrCo<sub>0.9</sub>Ti<sub>0.1</sub>O<sub>3-δ</sub> is a perovskite with cubic structure and is reported with good activity for OER in alkaline electrolyte.<sup>1</sup> The BET area for SrCo<sub>0.9</sub>Ti<sub>0.1</sub>O<sub>3-δ</sub> is 0.100 m<sup>2</sup>g<sup>-1</sup>. Here, firstly, the initial specific activity of SrCo<sub>0.9</sub>Ti<sub>0.1</sub>O<sub>3-δ</sub> is one to two orders of magnitude lower than that of SrCo<sub>0.9</sub>Ir<sub>0.1</sub>O<sub>3-δ</sub>. Secondly, within 5 cycles, the activity of SrCo<sub>0.9</sub>Ti<sub>0.1</sub>O<sub>3-δ</sub> fast degraded while the SrCo<sub>0.9</sub>Ir<sub>0.1</sub>O<sub>3-δ</sub> maintained its activity. These two results confirmed Co itself in SrCo<sub>0.9</sub>Ir<sub>0.1</sub>O<sub>3-δ</sub> has little contribute to the observed activity of SrCo<sub>0.9</sub>Ir<sub>0.1</sub>O<sub>3-δ</sub>. Additionally, as discussed in the following sections, a rapid dissolution of Sr and Co is expected in acidic electrolytes. The much lower current densities from SrCo<sub>0.9</sub>Ti<sub>0.1</sub>O<sub>3-δ</sub> also indicate that the leaching of Sr and Co won't give a "fake" high OER current. It is indeed the Ir-rich surface on SrCo<sub>0.9</sub>Ir<sub>0.1</sub>O<sub>3-δ</sub> that gives the high OER activity. In addition, an estimated maximum current due to Sr and Co leaching in initial 5 cycles is more than two orders of magnitude lower than the measured OER current from SrCo<sub>0.9</sub>Ir<sub>0.1</sub>O<sub>3-δ</sub>. (see the estimation of the current due to Sr and Co leaching in the **Methods**)

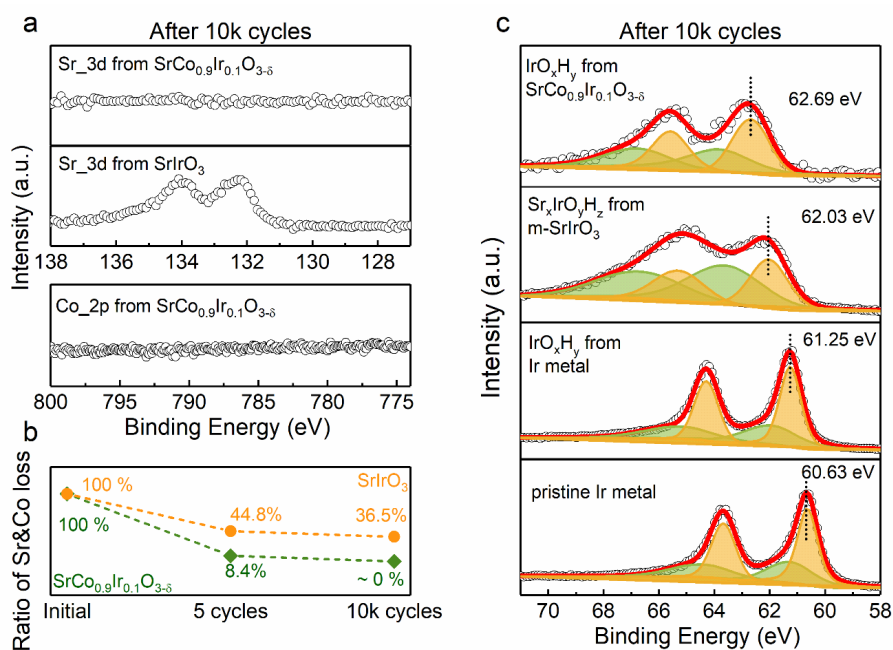

**Supplementary Figure 3. XPS characterization. a**, Sr\_3d and Co\_2p XPS from m-SrIrO<sub>3</sub> and SrCo<sub>0.9</sub>Ir<sub>0.1</sub>O<sub>3-δ</sub> after 10k CV cycles. **b**, the ratio of residual Sr and Co in the surface of m-SrIrO<sub>3</sub> and SrCo<sub>0.9</sub>Ir<sub>0.1</sub>O<sub>3-δ</sub> after 10k CV cycles. **c**, Ir\_4f XPS from Ir, m-SrIrO<sub>3</sub>, and SrCo<sub>0.9</sub>Ir<sub>0.1</sub>O<sub>3-δ</sub> after 10k CV cycles. The signal from pristine Ir metal is also presented for comparison. XPS fit parameters for Ir\_4f of all samples are shown in **Supplementary Table 5**.

As shown in **Supplementary Figure 3a**, after 10k cycles, the content of residual Sr and Co from the surface region of SrCo<sub>0.9</sub>Ir<sub>0.1</sub>O<sub>3-δ</sub> is below the detection limitation of XPS. As summarized in **Supplementary Figure 3b**, a high amount of Sr (36.5 %) remains in the surface region of m-SrIrO<sub>3</sub> after 10k cycles. The spectra of Ir\_4f from different samples are shown in **Supplementary Figure 3c**. The Ir\_4f signal from Ir metal is also measured for comparison. By 10k cycles, the Ir\_4f 7/2 peak shifts from 60.63 eV to 61.25 eV. This binding energy shift over Ir metal is similar to what has been reported in previous studies focusing on the formation of hydrous IrO<sub>x</sub> on metallic Ir surface.<sup>2,3</sup> From m-SrIrO<sub>3</sub> after 10k cycles, a binding energy of 62.03 eV of Ir\_4f 7/2 peak is observed. An even higher binding energy of 62.69 eV of Ir\_4f 7/2 peak is observed from SrCo<sub>0.9</sub>Ir<sub>0.1</sub>O<sub>3-δ</sub> after 10k cycles. Such high binding energy indicates the hydrous IrO<sub>x</sub> formed on SrCo<sub>0.9</sub>Ir<sub>0.1</sub>O<sub>3-δ</sub> is different from those formed on m-SrIrO<sub>3</sub> and Ir metal.

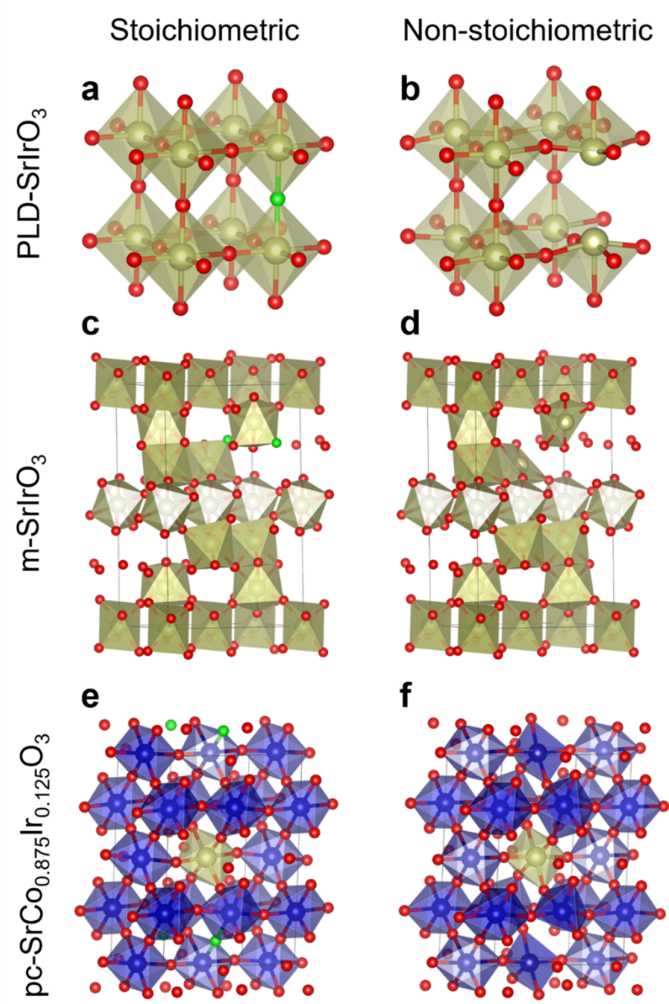

**Supplementary Figure 4. Crystal structural models.** The structural models for stoichiometric and non-stoichiometric PLD-SrIrO<sub>3</sub> (**a&b**), m-SrIrO<sub>3</sub> (**c&d**) and pc-SrCo<sub>0.875</sub>Ir<sub>0.125</sub>O<sub>3</sub> (**e&f**). The spheres in red, golden brown and blue colour represent O, Ir, and Co. The oxygen at the oxygen vacancy site is marked as green sphere. The Sr is not shown in all structural models. The non-stoichiometric phase for each compound is obtained after a comprehensive search for the most stable oxygen-deficient configuration.

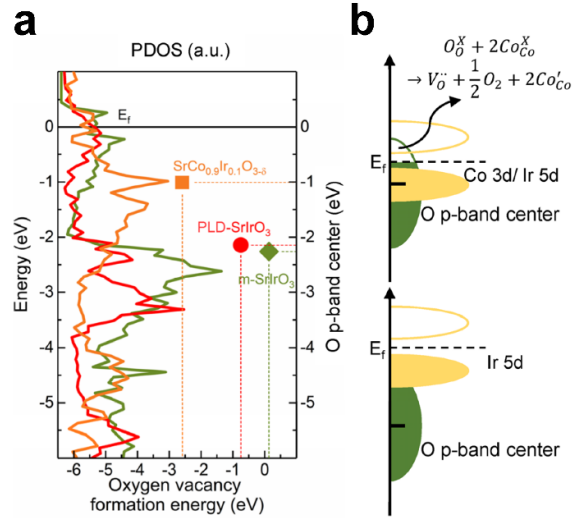

**Supplementary Figure 5. PDOS characterization.** **a**, Calculated projected density of states (PDOS) of O 2p, O p-band centers, and oxygen vacancy formation energies from m-SrIrO<sub>3</sub>, PLD-SrIrO<sub>3</sub> and SrCo<sub>0.9</sub>Ir<sub>0.1</sub>O<sub>3- $\delta$</sub> . The calculated O p-band center from SrCo<sub>0.9</sub>Ir<sub>0.1</sub>O<sub>3</sub> (-1.0 eV) is very close to the Fermi level. Instead, the O p-band centers from PLD-SrIrO<sub>3</sub> (-2.14 eV) and m-SrIrO<sub>3</sub> (-2.26 eV) are far away from the Fermi level. From a high vacancy formation energy of 0.14 eV, the formation of oxygen vacancies in m-SrIrO<sub>3</sub> is expected to be more difficult than SrCo<sub>0.9</sub>Ir<sub>0.1</sub>O<sub>3</sub>. The PLD-SrIrO<sub>3</sub> is in pseudo-cubic structure and shows a relatively low vacancy formation energy of -0.75 eV, indicating the pseudo-cubic structure can facilitate the formation of oxygen vacancies. Nevertheless, a high amount of oxygen vacancies is expected in the SrCo<sub>0.9</sub>Ir<sub>0.1</sub>O<sub>3</sub> due to a much low vacancy formation energy of -2.59 eV. **b**, Schematic of band structures for PLD-/m-SrIrO<sub>3</sub> and SrCo<sub>0.9</sub>Ir<sub>0.1</sub>O<sub>3</sub>. The formation of oxygen vacancies with the release of O<sub>2</sub> is presented using Kroger-Vink notation. A strong hybridization between O 2p band and Co 3d/Ir 5d in the SrCo<sub>0.9</sub>Ir<sub>0.1</sub>O<sub>3</sub> induces the release of lattice oxygen for the formation of oxygen vacancies.

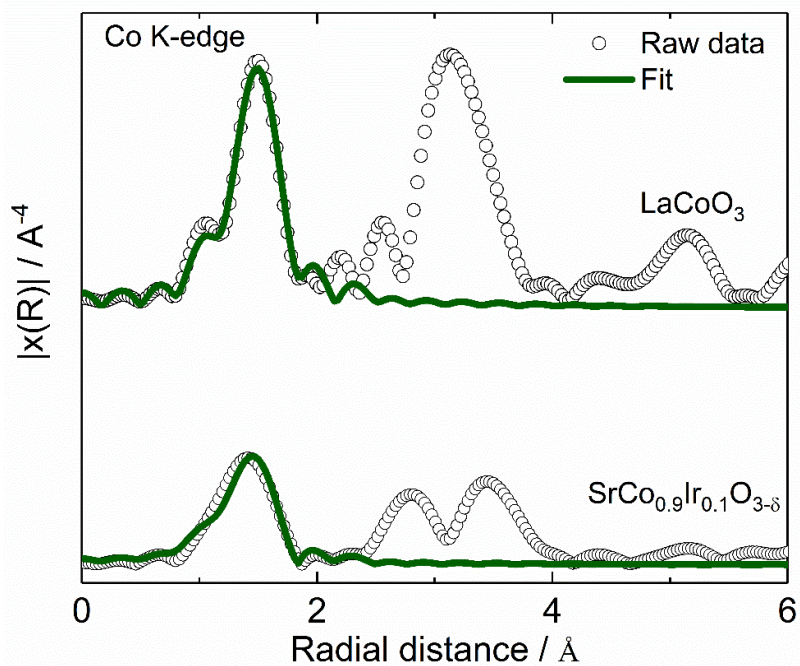

**Supplementary Figure 6. EXAFS fitting.** Fourier transformed  $k^3$ -weighted Co K edge EXAFS recorded from  $\text{LaCoO}_3$  and  $\text{SrCo}_{0.9}\text{Ir}_{0.1}\text{O}_{3-\delta}$ . A one-shell model was used to fit the first peak in the FT EXAFS spectra. The fitting ranges in  $k$ -space and  $R$ -space are  $2\text{-}12 \text{\AA}^{-1}$  and  $1\text{-}2 \text{\AA}$ , respectively. Detailed results are in **Supplementary Table 7**.

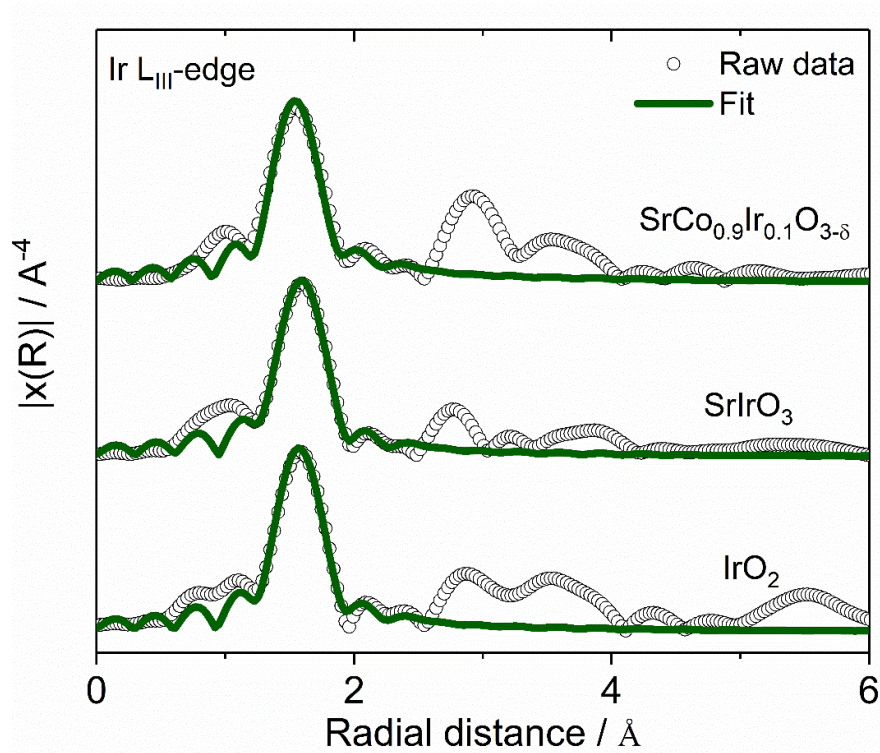

**Supplementary Figure 7. EXAFS fitting.** Fourier transformed  $k^3$ -weighted Ir L<sub>III</sub>-edge EXAFS recorded from  $\text{SrCo}_{0.9}\text{Ir}_{0.1}\text{O}_{3-\delta}$ ,  $\text{SrIrO}_3$  and  $\text{IrO}_2$ . A one-shell model was used to fit the first peak in the FT EXAFS spectra. The fitting ranges in  $k$ -space and  $R$ -space are 2-12  $\text{\AA}^{-1}$  and 1-2  $\text{\AA}$ , respectively. Detailed results are in **Supplementary Table 8**.



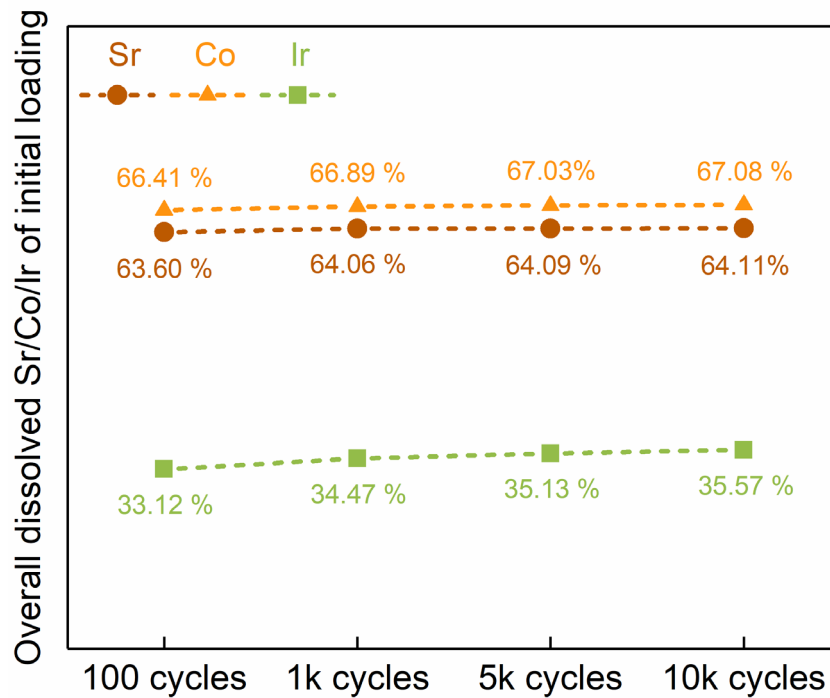

**Supplementary Figure 8. Cation dissolution during CV.** Overall dissolved Sr, Co, and Ir as % of initial loading during the CV cycling test from **Figure 5a**. At the first 100 cycles, a mass loss of 63.60 %, 66.41 %, and 33.12 % is found for Sr, Co, and Ir, respectively. This is due to the initial surface reconstruction process. Nevertheless, in the following 9.9k cycles, only tiny amounts of Sr, Co, and Ir are dissolved from  $\text{SrCo}_{0.9}\text{Ir}_{0.1}\text{O}_{3-\delta}$ .

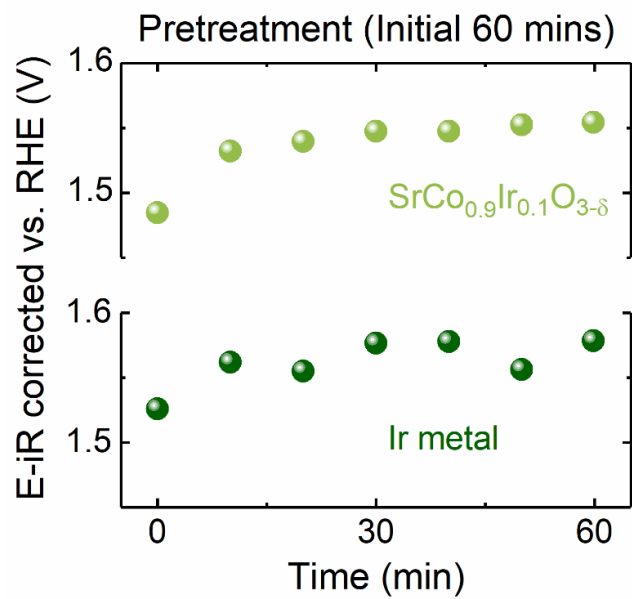

**Supplementary Figure 9. Pre-treatment by chronopotentiometry.** The pre-treatment (initial 60 min) by chronopotentiometry at  $10 \text{ mA cm}^{-2}$  for SrCo<sub>0.9</sub>Ir<sub>0.1</sub>O<sub>3-δ</sub> and Ir metal.

**Supplementary Table 1.** Refined structure information

| SrCo <sub>0.9</sub> Ir <sub>0.1</sub> O <sub>3-δ</sub> |                                     |              |
|--------------------------------------------------------|-------------------------------------|--------------|
| Space group                                            | P <i>nma</i>                        |              |
| a(Å)                                                   | 5.4626(5)                           |              |
| b(Å)                                                   | 7.7716(1)                           |              |
| c(Å)                                                   | 5.4634(5)                           |              |
|                                                        | Sr                                  |              |
| Wyckoff site                                           | 4c                                  |              |
| Occ.                                                   | (0.0048(12), 1/4, -0.0049(38))      |              |
| U <sub>iso</sub> (Å <sup>2</sup> )                     | 1                                   |              |
|                                                        | Co                                  | Ir           |
| Wyckoff site                                           | 4b                                  |              |
| Occ.                                                   | 0.907(0.003)                        | 0.093(0.003) |
| U <sub>iso</sub> (Å <sup>2</sup> )                     | 0.0326                              |              |
|                                                        | O1                                  |              |
| Wyckoff site                                           | 4c                                  |              |
| Occ.                                                   | (0.0682(57), 1/4, 0.493(13))        |              |
| U <sub>iso</sub> (Å <sup>2</sup> )                     | 1*                                  |              |
|                                                        | O2                                  |              |
| Wyckoff site                                           | 8d                                  |              |
| Occ.                                                   | (0.200(2), -0.0070(63), 0.2549(31)) |              |
| U <sub>iso</sub> (Å <sup>2</sup> )                     | 1*                                  |              |
|                                                        | 0.0871                              |              |

\*The occupancy of oxygen was fixed during the refinement.

**Supplementary Table 2.** XPS fit parameters for Sr\_3d and Ir\_4f of m-SrIrO<sub>3</sub>

|                            | Pristine SrIrO <sub>3</sub> |                   |                   |                   | 5 times cycled m-SrIrO <sub>3</sub> |                   |                   |                   |
|----------------------------|-----------------------------|-------------------|-------------------|-------------------|-------------------------------------|-------------------|-------------------|-------------------|
|                            | <b>Sr</b>                   |                   |                   |                   |                                     |                   |                   |                   |
|                            | 3d <sub>3/2</sub>           | 3d <sub>5/2</sub> | 3d <sub>3/2</sub> | 3d <sub>5/2</sub> | 3d <sub>3/2</sub>                   | 3d <sub>5/2</sub> | 3d <sub>3/2</sub> | 3d <sub>5/2</sub> |
| <b>Binding energy (eV)</b> | 132.3                       | 130.55            | 133.35            | 131.81            | 132.88                              | 131.15            | 134.49            | 132.62            |
| <b>FWHM (eV)</b>           | 1.09                        | 1                 | 2.69              | 2.42              | 0.97                                | 1.08              | 3.51              | 2.77              |
|                            | <b>Ir</b>                   |                   |                   |                   |                                     |                   |                   |                   |
|                            | 4f <sub>5/2</sub>           | 4f <sub>7/2</sub> | 4f <sub>5/2</sub> | 4f <sub>7/2</sub> | 4f <sub>5/2</sub>                   | 4f <sub>7/2</sub> | 4f <sub>5/2</sub> | 4f <sub>7/2</sub> |
| <b>Binding energy (eV)</b> | 63.33                       | 60.33             | 64.7              | 61.7              | 64.19                               | 61.19             | 66.35             | 63.35             |
| <b>FWHM (eV)</b>           | 1.87                        | 1.57              | 2.96              | 3.15              | 2.59                                | 1.98              | 4.19              | 3.99              |

**Supplementary Table 3.** XPS fit parameters for Sr\_3d and Ir\_4f of SrCo<sub>0.9</sub>Ir<sub>0.1</sub>O<sub>3-δ</sub>.

|                            |   | Pristine SrCo <sub>0.9</sub> Ir <sub>0.1</sub> O <sub>3-δ</sub> |                   |                   |                   | 5 times cycled SrCo <sub>0.9</sub> Ir <sub>0.1</sub> O <sub>3-δ</sub> |                   |                   |                   |
|----------------------------|---|-----------------------------------------------------------------|-------------------|-------------------|-------------------|-----------------------------------------------------------------------|-------------------|-------------------|-------------------|
|                            |   | <b>Sr</b>                                                       |                   |                   |                   |                                                                       |                   |                   |                   |
|                            |   | 3d <sub>3/2</sub>                                               |                   | 3d <sub>5/2</sub> |                   |                                                                       |                   |                   |                   |
| <b>Binding energy (eV)</b> | / | 133.6                                                           |                   | 131.83            |                   | /                                                                     |                   |                   |                   |
| <b>FWHM (eV)</b>           |   | 2.42                                                            |                   | 2.38              |                   |                                                                       |                   |                   |                   |
|                            |   | <b>Ir</b>                                                       |                   |                   |                   |                                                                       |                   |                   |                   |
|                            |   | 4f <sub>5/2</sub> *                                             | 4f <sub>7/2</sub> | 4f <sub>5/2</sub> | 4f <sub>7/2</sub> | 4f <sub>5/2</sub>                                                     | 4f <sub>7/2</sub> | 4f <sub>5/2</sub> | 4f <sub>7/2</sub> |
| <b>Binding energy (eV)</b> |   | 62.7                                                            | 59.7              | 64.98             | 61.98             | 63.98                                                                 | 60.98             | 65.53             | 62.53             |
| <b>FWHM (eV)</b>           |   | 2.84                                                            | 2.84              | 2.79              | 2.79              | 2.33                                                                  | 1.75              | 4.14              | 4.29              |

\*The FWHM for the doublet from Ir\_4f in Pristine SrCo<sub>0.9</sub>Ir<sub>0.1</sub>O<sub>3-δ</sub> is constrained to be equal.

**Supplementary Table 4.** XPS fit parameters for Ir\_4f of IrO<sub>2</sub>.

|                                     |                                    | 4f <sub>5/2</sub> | 4f <sub>7/2</sub> | 4f <sub>5/2</sub> sat <sub>1</sub> | 4f <sub>5/2</sub> sat <sub>2</sub> | 4f <sub>7/2</sub> sat <sub>1</sub> |
|-------------------------------------|------------------------------------|-------------------|-------------------|------------------------------------|------------------------------------|------------------------------------|
| <b>Pristine<br/>IrO<sub>2</sub></b> | <b>Binding<br/>energy<br/>(eV)</b> | 64.59             | 61.61             | 65.56                              | 67.6                               | 62.57                              |
|                                     | <b>FWHM<br/>(eV)</b>               | 1.11              | 0.92              | 2.19                               | 2.01                               | 2.41                               |
| <b>Cycled<br/>IrO<sub>2</sub></b>   | <b>Binding<br/>energy<br/>(eV)</b> | 64.61             | 61.63             | 65.49                              | 67.76                              | 62.51                              |
|                                     | <b>FWHM<br/>(eV)</b>               | 1.06              | 0.95              | 2.49                               | 2.31                               | 2.76                               |

**Supplementary Table 5.** XPS fit parameters for Ir<sub>4f</sub> of pristine Ir and 10k times cycled Ir, m-SrIrO<sub>3</sub>, and SrCo<sub>0.9</sub>Ir<sub>0.1</sub>O<sub>3-δ</sub>.

|                            | <b>Pristine Ir</b>         |                   |                   |                   | <b>10k times cycled m-SrIrO<sub>3</sub></b>                               |                   |                   |                   |
|----------------------------|----------------------------|-------------------|-------------------|-------------------|---------------------------------------------------------------------------|-------------------|-------------------|-------------------|
|                            | 4f <sub>5/2</sub>          | 4f <sub>7/2</sub> | 4f <sub>5/2</sub> | 4f <sub>7/2</sub> | 4f <sub>5/2</sub>                                                         | 4f <sub>7/2</sub> | 4f <sub>5/2</sub> | 4f <sub>7/2</sub> |
| <b>Binding energy (eV)</b> | 63.67                      | 60.63             | 64.41             | 61.28             | 65.28                                                                     | 62.03             | 66.71             | 63.63             |
| <b>FWHM (eV)</b>           | 1.04                       | 0.88              | 2.77              | 2.03              | 2.13                                                                      | 1.63              | 3.72              | 3.15              |
|                            | <b>10k times cycled Ir</b> |                   |                   |                   | <b>10k times cycled SrCo<sub>0.9</sub>Ir<sub>0.1</sub>O<sub>3-δ</sub></b> |                   |                   |                   |
|                            | 4f <sub>5/2</sub>          | 4f <sub>7/2</sub> | 4f <sub>5/2</sub> | 4f <sub>7/2</sub> | 4f <sub>5/2</sub>                                                         | 4f <sub>7/2</sub> | 4f <sub>5/2</sub> | 4f <sub>7/2</sub> |
| <b>Binding energy (eV)</b> | 64.28                      | 61.25             | 65.21             | 61.97             | 65.58                                                                     | 62.69             | 66.8              | 63.84             |
| <b>FWHM (eV)</b>           | 1.02                       | 0.91              | 3.1               | 2.45              | 1.55                                                                      | 1.59              | 2.84              | 2.84              |

**Supplementary Table 6.** Oxygen vacancy formation enthalpy

| <b>Sample</b>                                                            | <b>O vacancy percent (%)</b> | <b>Oxygen vacancy formation enthalpy (eV)</b> |
|--------------------------------------------------------------------------|------------------------------|-----------------------------------------------|
| PLD-SrIrO <sub>3</sub>                                                   | 4.167                        | -0.74589                                      |
| m-SrIrO <sub>3</sub>                                                     | 3.125                        | 0.14067                                       |
| SrCo <sub>0.9</sub> Ir <sub>0.1</sub> O <sub>3-<math>\delta</math></sub> | 4.167                        | -2.58998                                      |



**Supplementary Table 7.** Fitting parameters of the Fourier-transformed  $k^3$ -weighted Co K-edge EXAFS from  $\text{LaCoO}_3$  and  $\text{SrCo}_{0.9}\text{Ir}_{0.1}\text{O}_{3-\delta}$ .

|                                                       | <b>Co-O (<math>\text{\AA}</math>)</b> | <b>CN<sup>1</sup></b> | <b><math>\sigma^2</math> (<math>\text{\AA}^2</math>)<sup>2</sup></b> | <b><math>\Delta E_0</math><sup>3</sup></b> |
|-------------------------------------------------------|---------------------------------------|-----------------------|----------------------------------------------------------------------|--------------------------------------------|
| $\text{LaCoO}_3$                                      | 1.927(0.009)                          | 6.0(0.5)              | 0.0031(0.0012)                                                       | 0.19(0.96)                                 |
| $\text{SrCo}_{0.9}\text{Ir}_{0.1}\text{O}_{3-\delta}$ | 1.909(0.012)                          | 4.1(0.5)              | 0.0070(0.0019)                                                       | -0.77(1.22)                                |

1. **CN:** Coordination number
2.  **$\sigma^2$ :** Mean-square-displacement in R
3.  **$\Delta E_0$ :** Energy shift

**Supplementary Table 8.** Fit parameters of the Fourier-transformed  $k^3$ -weighted Ir  $L_{III}$ -edge EXAFS from  $\text{IrO}_2$ ,  $m\text{-SrIrO}_3$  and  $\text{SrCo}_{0.9}\text{Ir}_{0.1}\text{O}_{3-\delta}$ .

|                                                       | Ir-O ( $\text{\AA}$ ) | CN       | $\sigma^2$ ( $\text{\AA}^2$ ) | $\Delta E_0$ |
|-------------------------------------------------------|-----------------------|----------|-------------------------------|--------------|
| $\text{IrO}_2$                                        | 1.970(0.019)          | 6.0(1.0) | 0.0016(0.0024)                | 12.6(2.2)    |
| $m\text{-SrIrO}_3$                                    | 1.989(0.020)          | 6.3(1.2) | 0.0022(0.0026)                | 13.4(2.3)    |
| $\text{SrCo}_{0.9}\text{Ir}_{0.1}\text{O}_{3-\delta}$ | 1.933(0.019)          | 4.9(0.9) | 0.0006(0.0023)                | 12.5(2.3)    |

## Supplementary References

1. Su C, *et al.* SrCo<sub>0.9</sub>Ti<sub>0.1</sub>O<sub>3-delta</sub> as a new electrocatalyst for the oxygen evolution reaction in alkaline electrolyte with stable performance. *Acs Appl. Mater. Inter.* **7**, 17663-17670 (2015).
2. Li T, *et al.* Atomic-scale insights into surface species of electrocatalysts in three dimensions. *Nat. Catal.* **1**, 300-305 (2018).
3. Pfeifer V, *et al.* The electronic structure of iridium oxide electrodes active in water splitting. *Phys Chem Chem Phys* **18**, 2292-2296 (2016).
